# Supplementary material
Source: publisher figshare collection journal article supplement (https://gsajournals.figshare.com/ndownloader/files/25930341)
Supplement: Supplementary file 1 [file 25930341]

## Sheet: Male_Process
GO Term	Description	P-value	FDR q-value	Enrichment	N	B	n	b	Genes
GO:0003341	cilium movement	9.26e-06	0.0665	3.02	1174	27	259	18	[HYDIN - hydin, axonemal central pair apparatus protein, SPA17 - sperm autoantigenic protein 17, CCDC151 - coiled-coil domain containing 151, TEKT4 - tektin 4, WDR78 - wd repeat domain 78, CCDC37 - coiled-coil domain containing 37, CCDC40 - coiled-coil domain containing 40, DYX1C1 - dyslexia susceptibility 1 candidate 1, DNAH3 - dynein, axonemal, heavy chain 3, ROPN1L - rhophilin associated tail …
GO:0001539	cilium or flagellum-dependent cell motility	0.000291	1	6.81	1174	9	115	6	[CCDC65 - coiled-coil domain containing 65, DNAH3 - dynein, axonemal, heavy chain 3, DRC1 - dynein regulatory complex subunit 1 homolog (chlamydomonas), DNAH7 - dynein, axonemal, heavy chain 7, DNAH8 - dynein, axonemal, heavy chain 8, EFHC1 - ef-hand domain (c-terminal) containing 1]
GO:0060285	cilium-dependent cell motility	0.000291	0.697	6.81	1174	9	115	6	[CCDC65 - coiled-coil domain containing 65, DNAH3 - dynein, axonemal, heavy chain 3, DNAH7 - dynein, axonemal, heavy chain 7, DRC1 - dynein regulatory complex subunit 1 homolog (chlamydomonas), DNAH8 - dynein, axonemal, heavy chain 8, EFHC1 - ef-hand domain (c-terminal) containing 1]
GO:0007017	microtubule-based process	0.000308	0.554	1.92	1174	103	220	37	[CC2D2A - coiled-coil and c2 domain containing 2a, MAPRE3 - microtubule-associated protein, rp/eb family, member 3, CCDC78 - coiled-coil domain containing 78, KATNA1 - katanin p60 (atpase containing) subunit a 1, FAM154B - family with sequence similarity 154, member b, FGF10 - fibroblast growth factor 10, SPAG16 - sperm associated antigen 16, WDR78 - wd repeat domain 78, CCDC40 - coiled-coil doma…
GO:0006896	Golgi to vacuole transport	0.000852	1	1174	1174	1	1	1	[VTI1A - vesicle transport through interaction with t-snares 1a]
GO:0050882	voluntary musculoskeletal movement	0.000852	1	1174	1174	1	1	1	[VTI1A - vesicle transport through interaction with t-snares 1a]
GO:0048280	vesicle fusion with Golgi apparatus	0.000852	0.874	1174	1174	1	1	1	[VTI1A - vesicle transport through interaction with t-snares 1a]
GO:0070286	axonemal dynein complex assembly	0.000964	0.866	3	1174	20	235	12	[CCDC37 - coiled-coil domain containing 37, CCDC40 - coiled-coil domain containing 40, CCDC65 - coiled-coil domain containing 65, ZMYND10 - zinc finger, mynd-type containing 10, DYX1C1 - dyslexia susceptibility 1 candidate 1, DNAL1 - dynein, axonemal, light chain 1, CCDC151 - coiled-coil domain containing 151, DNAH5 - dynein, axonemal, heavy chain 5, DNAH7 - dynein, axonemal, heavy chain 7, DRC1 …

## Sheet: Male_Component
GO Term	Description	P-value	FDR q-value	Enrichment	N	B	n	b	Genes
GO:0030286	dynein complex	2.65e-07	0.000244	5.77	1174	23	115	13	[DNAH10 - dynein, axonemal, heavy chain 10, DRC1 - dynein regulatory complex subunit 1 homolog (chlamydomonas), DNAL4 - dynein, axonemal, light chain 4, CCDC65 - coiled-coil domain containing 65, DNAH3 - dynein, axonemal, heavy chain 3, DYNC2H1 - dynein, cytoplasmic 2, heavy chain 1, DNAH5 - dynein, axonemal, heavy chain 5, DNAH7 - dynein, axonemal, heavy chain 7, WDR63 - wd repeat domain 63, DNA…
GO:0044447	axoneme part	1.36e-06	0.000625	3.63	1174	22	235	16	[HYDIN - hydin, axonemal central pair apparatus protein, DNAL1 - dynein, axonemal, light chain 1, FAM154B - family with sequence similarity 154, member b, DRC1 - dynein regulatory complex subunit 1 homolog (chlamydomonas), SPAG16 - sperm associated antigen 16, WDR78 - wd repeat domain 78, CCDC37 - coiled-coil domain containing 37, CCDC65 - coiled-coil domain containing 65, DNAH3 - dynein, axonema…
GO:0031514	motile cilium	5.66e-06	0.00174	5.68	1174	40	62	12	[IQUB - iq motif and ubiquitin domain containing, CCDC65 - coiled-coil domain containing 65, EFCAB2 - ef-hand calcium binding domain 2, ROPN1L - rhophilin associated tail protein 1-like, DYNC2H1 - dynein, cytoplasmic 2, heavy chain 1, AK7 - adenylate kinase 7, DNAH5 - dynein, axonemal, heavy chain 5, DRC1 - dynein regulatory complex subunit 1 homolog (chlamydomonas), IQCA1 - iq motif containing w…
GO:0044441	ciliary part	8.14e-06	0.00188	1.41	1174	104	655	82	[ODF3 - outer dense fiber of sperm tails 3, CC2D2A - coiled-coil and c2 domain containing 2a, TTC21B - tetratricopeptide repeat domain 21b, DNAL1 - dynein, axonemal, light chain 1, CEP89 - centrosomal protein 89kda, IFT46 - intraflagellar transport 46 homolog (chlamydomonas), WDR78 - wd repeat domain 78, PTPRK - protein tyrosine phosphatase, receptor type, k, CEP164 - centrosomal protein 164kda, …
GO:0005929	cilium	3.32e-05	0.00613	1.52	1174	87	561	63	[FBXL13 - f-box and leucine-rich repeat protein 13, TTC21B - tetratricopeptide repeat domain 21b, CEP104 - centrosomal protein 104kda, CEP89 - centrosomal protein 89kda, IFT46 - intraflagellar transport 46 homolog (chlamydomonas), TTLL3 - tubulin tyrosine ligase-like family, member 3, IFT74 - intraflagellar transport 74 homolog (chlamydomonas), IQUB - iq motif and ubiquitin domain containing, CCD…
GO:0005858	axonemal dynein complex	6.79e-05	0.0104	4.66	1174	12	189	9	[CCDC65 - coiled-coil domain containing 65, DNAL1 - dynein, axonemal, light chain 1, DNAH3 - dynein, axonemal, heavy chain 3, DNAH5 - dynein, axonemal, heavy chain 5, DNAH7 - dynein, axonemal, heavy chain 7, DRC1 - dynein regulatory complex subunit 1 homolog (chlamydomonas), WDR63 - wd repeat domain 63, DNAH8 - dynein, axonemal, heavy chain 8, WDR78 - wd repeat domain 78]
GO:0097223	sperm part	0.000107	0.014	3.11	1174	26	218	15	[ODF3 - outer dense fiber of sperm tails 3, SPA17 - sperm autoantigenic protein 17, ZPBP2 - zona pellucida binding protein 2, FAM154B - family with sequence similarity 154, member b, MORN2 - morn repeat containing 2, SPAG16 - sperm associated antigen 16, IQUB - iq motif and ubiquitin domain containing, ENKUR - enkurin, trpc channel interacting protein, TCTE1 - t-complex-associated-testis-expresse…
GO:0005875	microtubule associated complex	0.000149	0.0172	3.79	1174	35	115	13	[DRC1 - dynein regulatory complex subunit 1 homolog (chlamydomonas), DNAH10 - dynein, axonemal, heavy chain 10, DNAL4 - dynein, axonemal, light chain 4, CCDC65 - coiled-coil domain containing 65, DNAH3 - dynein, axonemal, heavy chain 3, DYNC2H1 - dynein, cytoplasmic 2, heavy chain 1, DNAH5 - dynein, axonemal, heavy chain 5, DNAH7 - dynein, axonemal, heavy chain 7, WDR63 - wd repeat domain 63, DNA…
GO:0044430	cytoskeletal part	0.000363	0.0372	1.24	1174	208	657	144	[MAD2L1BP - mad2l1 binding protein, ODF3 - outer dense fiber of sperm tails 3, MAPRE3 - microtubule-associated protein, rp/eb family, member 3, CCDC78 - coiled-coil domain containing 78, CEP89 - centrosomal protein 89kda, LRRC16A - leucine rich repeat containing 16a, IFT46 - intraflagellar transport 46 homolog (chlamydomonas), PPP1R9A - protein phosphatase 1, regulatory subunit 9a, MID1 - midline…
GO:0099513	polymeric cytoskeletal fiber	0.000938	0.0865	2.01	1174	77	220	29	[ODF3 - outer dense fiber of sperm tails 3, TPM4 - tropomyosin 4, KATNA1 - katanin p60 (atpase containing) subunit a 1, DNAL1 - dynein, axonemal, light chain 1, MAPRE3 - microtubule-associated protein, rp/eb family, member 3, FAM154B - family with sequence similarity 154, member b, TCHP - trichoplein, keratin filament binding, SLC8A1 - solute carrier family 8 (sodium/calcium exchanger), member 1,…

## Sheet: Larval_Process
GO Term	Description	P-value	FDR q-value	Enrichment	N	B	n	b	Genes
GO:0009108	coenzyme biosynthetic process	1.2e-05	0.114	6.37	2047	24	134	10	[ASPDH - aspartate dehydrogenase domain containing, SLC25A1 - solute carrier family 25 (mitochondrial carrier; citrate transporter), member 1, SCD5 - stearoyl-coa desaturase 5, AFMID - arylformamidase, GCH1 - gtp cyclohydrolase 1, SLC22A13 - solute carrier family 22 (organic anion/urate transporter), member 13, SLC5A8 - solute carrier family 5 (sodium/monocarboxylate cotransporter), member 8, PPT…
GO:0002376	immune system process	1.24e-05	0.0586	1.71	2047	246	326	67	[CD93 - cd93 molecule, VAV3 - vav 3 guanine nucleotide exchange factor, LGMN - legumain, SYK - spleen tyrosine kinase, SLA2 - src-like-adaptor 2, DTX3L - deltex 3-like (drosophila), PTX3 - pentraxin 3, long, WNK1 - wnk lysine deficient protein kinase 1, PTPRO - protein tyrosine phosphatase, receptor type, o, PAX5 - paired box 5, TREX1 - three prime repair exonuclease 1, TFEB - transcription facto…
GO:0001775	cell activation	8.31e-05	0.262	2.75	2047	139	123	23	[CD93 - cd93 molecule, CEACAM1 - carcinoembryonic antigen-related cell adhesion molecule 1 (biliary glycoprotein), VAV3 - vav 3 guanine nucleotide exchange factor, SLA2 - src-like-adaptor 2, PTX3 - pentraxin 3, long, RUNX2 - runt-related transcription factor 2, GPR18 - g protein-coupled receptor 18, PRKCQ - protein kinase c, theta, IL12B - interleukin 12b (natural killer cell stimulatory factor 2…
GO:0002757	immune response-activating signal transduction	8.88e-05	0.21	3.77	2047	40	190	14	[CTSL - cathepsin l, FGG - fibrinogen gamma chain, VAV3 - vav 3 guanine nucleotide exchange factor, HCK - hemopoietic cell kinase, LGMN - legumain, SLA2 - src-like-adaptor 2, SYK - spleen tyrosine kinase, MAPKAPK2 - mitogen-activated protein kinase-activated protein kinase 2, PRKCQ - protein kinase c, theta, C3AR1 - complement component 3a receptor 1, VAV1 - vav 1 guanine nucleotide exchange fact…
GO:0002764	immune response-regulating signaling pathway	0.000113	0.214	3.51	2047	46	190	15	[CTSL - cathepsin l, FGG - fibrinogen gamma chain, VAV3 - vav 3 guanine nucleotide exchange factor, HCK - hemopoietic cell kinase, LGMN - legumain, SYK - spleen tyrosine kinase, SLA2 - src-like-adaptor 2, MAPKAPK2 - mitogen-activated protein kinase-activated protein kinase 2, PRKCQ - protein kinase c, theta, C3AR1 - complement component 3a receptor 1, VAV1 - vav 1 guanine nucleotide exchange fact…
GO:0051188	cofactor biosynthetic process	0.000131	0.207	5.09	2047	30	134	10	[ASPDH - aspartate dehydrogenase domain containing, SLC25A1 - solute carrier family 25 (mitochondrial carrier; citrate transporter), member 1, SCD5 - stearoyl-coa desaturase 5, AFMID - arylformamidase, SLC22A13 - solute carrier family 22 (organic anion/urate transporter), member 13, GCH1 - gtp cyclohydrolase 1, SLC5A8 - solute carrier family 5 (sodium/monocarboxylate cotransporter), member 8, FAS…
GO:0018958	phenol-containing compound metabolic process	0.000148	0.2	3.25	2047	20	410	13	[GRIN2A - glutamate receptor, ionotropic, n-methyl d-aspartate 2a, DIO3 - deiodinase, iodothyronine, type iii, MOXD2P - monooxygenase, dbh-like 2, pseudogene, NPR1 - natriuretic peptide receptor a/guanylate cyclase a (atrionatriuretic peptide receptor a), DAO - d-amino-acid oxidase, DCT - dopachrome tautomerase, HDC - histidine decarboxylase, GCNT4 - glucosaminyl (n-acetyl) transferase 4, core 2,…
GO:0050776	regulation of immune response	0.000179	0.212	2.48	2047	108	191	25	[FGG - fibrinogen gamma chain, GFI1 - growth factor independent 1 transcription repressor, VAV3 - vav 3 guanine nucleotide exchange factor, LGMN - legumain, SYK - spleen tyrosine kinase, SLA2 - src-like-adaptor 2, PAX5 - paired box 5, IL12B - interleukin 12b (natural killer cell stimulatory factor 2, cytotoxic lymphocyte maturation factor 2, p40), TLR2 - toll-like receptor 2, TLR5 - toll-like rec…
GO:0010631	epithelial cell migration	0.000189	0.198	2.48	2047	18	687	15	[PRSS3 - protease, serine, 3, GPR124 - g protein-coupled receptor 124, VEGFA - vascular endothelial growth factor a, PLXND1 - plexin d1, CLEC14A - c-type lectin domain family 14, member a, ZEB2 - zinc finger e-box binding homeobox 2, LOXL2 - lysyl oxidase-like 2, KDR - kinase insert domain receptor (a type iii receptor tyrosine kinase), DPP4 - dipeptidyl-peptidase 4, NANOS1 - nanos homolog 1 (dro…
GO:0002253	activation of immune response	0.000214	0.202	3.37	2047	48	190	15	[CTSL - cathepsin l, FGG - fibrinogen gamma chain, VAV3 - vav 3 guanine nucleotide exchange factor, HCK - hemopoietic cell kinase, LGMN - legumain, SLA2 - src-like-adaptor 2, SYK - spleen tyrosine kinase, MAPKAPK2 - mitogen-activated protein kinase-activated protein kinase 2, C1QB - complement component 1, q subcomponent, b chain, PRKCQ - protein kinase c, theta, C3AR1 - complement component 3a r…
GO:0002252	immune effector process	0.000242	0.209	3.16	2047	102	108	17	[CD93 - cd93 molecule, CEACAM1 - carcinoembryonic antigen-related cell adhesion molecule 1 (biliary glycoprotein), HCK - hemopoietic cell kinase, VAV3 - vav 3 guanine nucleotide exchange factor, DTX3L - deltex 3-like (drosophila), PTX3 - pentraxin 3, long, C1QB - complement component 1, q subcomponent, b chain, IL12B - interleukin 12b (natural killer cell stimulatory factor 2, cytotoxic lymphocyt…
GO:1901293	nucleoside phosphate biosynthetic process	0.000261	0.206	4.07	2047	45	134	12	[ASPDH - aspartate dehydrogenase domain containing, SLC25A1 - solute carrier family 25 (mitochondrial carrier; citrate transporter), member 1, SLC26A2 - solute carrier family 26 (anion exchanger), member 2, SCD5 - stearoyl-coa desaturase 5, AFMID - arylformamidase, NPR1 - natriuretic peptide receptor a/guanylate cyclase a (atrionatriuretic peptide receptor a), SLC22A13 - solute carrier family 22 …
GO:0009165	nucleotide biosynthetic process	0.000261	0.19	4.07	2047	45	134	12	[ASPDH - aspartate dehydrogenase domain containing, SLC25A1 - solute carrier family 25 (mitochondrial carrier; citrate transporter), member 1, SLC26A2 - solute carrier family 26 (anion exchanger), member 2, SCD5 - stearoyl-coa desaturase 5, AFMID - arylformamidase, NPR1 - natriuretic peptide receptor a/guanylate cyclase a (atrionatriuretic peptide receptor a), SLC22A13 - solute carrier family 22 …
GO:0002431	Fc receptor mediated stimulatory signaling pathway	0.000267	0.18	16.78	2047	8	61	4	[VAV3 - vav 3 guanine nucleotide exchange factor, HCK - hemopoietic cell kinase, VAV1 - vav 1 guanine nucleotide exchange factor, PTK2 - protein tyrosine kinase 2]
GO:0002433	immune response-regulating cell surface receptor signaling pathway involved in phagocytosis	0.000267	0.168	16.78	2047	8	61	4	[VAV3 - vav 3 guanine nucleotide exchange factor, HCK - hemopoietic cell kinase, VAV1 - vav 1 guanine nucleotide exchange factor, PTK2 - protein tyrosine kinase 2]
GO:0038096	Fc-gamma receptor signaling pathway involved in phagocytosis	0.000267	0.158	16.78	2047	8	61	4	[HCK - hemopoietic cell kinase, VAV3 - vav 3 guanine nucleotide exchange factor, VAV1 - vav 1 guanine nucleotide exchange factor, PTK2 - protein tyrosine kinase 2]
GO:0038094	Fc-gamma receptor signaling pathway	0.000267	0.149	16.78	2047	8	61	4	[VAV3 - vav 3 guanine nucleotide exchange factor, HCK - hemopoietic cell kinase, VAV1 - vav 1 guanine nucleotide exchange factor, PTK2 - protein tyrosine kinase 2]
GO:0045321	leukocyte activation	0.000295	0.155	2.99	2047	114	108	18	[CD93 - cd93 molecule, CEACAM1 - carcinoembryonic antigen-related cell adhesion molecule 1 (biliary glycoprotein), PTX3 - pentraxin 3, long, RUNX2 - runt-related transcription factor 2, GPR18 - g protein-coupled receptor 18, IL12B - interleukin 12b (natural killer cell stimulatory factor 2, cytotoxic lymphocyte maturation factor 2, p40), C3AR1 - complement component 3a receptor 1, CD22 - cd22 mol…
GO:0032757	positive regulation of interleukin-8 production	0.00038	0.189	6.22	2047	5	329	5	[SYK - spleen tyrosine kinase, TLR2 - toll-like receptor 2, TLR5 - toll-like receptor 5, F2R - coagulation factor ii (thrombin) receptor, F2RL1 - coagulation factor ii (thrombin) receptor-like 1]
GO:0001910	regulation of leukocyte mediated cytotoxicity	0.000402	0.19	9.94	2047	10	103	5	[CEACAM1 - carcinoembryonic antigen-related cell adhesion molecule 1 (biliary glycoprotein), VAV1 - vav 1 guanine nucleotide exchange factor, F2RL1 - coagulation factor ii (thrombin) receptor-like 1, DNASE1 - deoxyribonuclease i, IL12B - interleukin 12b (natural killer cell stimulatory factor 2, cytotoxic lymphocyte maturation factor 2, p40)]
GO:0032653	regulation of interleukin-10 production	0.000406	0.183	6.09	2047	8	252	6	[HGF - hepatocyte growth factor (hepapoietin a; scatter factor), SYK - spleen tyrosine kinase, TLR2 - toll-like receptor 2, TRIB2 - tribbles homolog 2 (drosophila), IL12B - interleukin 12b (natural killer cell stimulatory factor 2, cytotoxic lymphocyte maturation factor 2, p40), DLL1 - delta-like 1 (drosophila)]
GO:0050731	positive regulation of peptidyl-tyrosine phosphorylation	0.000493	0.212	3.67	2047	35	191	12	[HES1 - hairy and enhancer of split 1, (drosophila), HGF - hepatocyte growth factor (hepapoietin a; scatter factor), ENPP2 - ectonucleotide pyrophosphatase/phosphodiesterase 2, CRLF1 - cytokine receptor-like factor 1, PARP14 - poly (adp-ribose) polymerase family, member 14, SYK - spleen tyrosine kinase, KIT - v-kit hardy-zuckerman 4 feline sarcoma viral oncogene homolog, HBEGF - heparin-binding e…
GO:1901566	organonitrogen compound biosynthetic process	0.000506	0.208	1.38	2047	204	719	99	[SCD5 - stearoyl-coa desaturase 5, COX5B - cytochrome c oxidase subunit vb, TREX1 - three prime repair exonuclease 1, PPM1L - protein phosphatase, mg2+/mn2+ dependent, 1l, APOB - apolipoprotein b, INHA - inhibin, alpha, GCNT2 - glucosaminyl (n-acetyl) transferase 2, i-branching enzyme (i blood group), GCH1 - gtp cyclohydrolase 1, GSTT1 - glutathione s-transferase theta 1, P2RX1 - purinergic recep…
GO:0090066	regulation of anatomical structure size	0.000625	0.247	1.62	2047	86	690	47	[SCPEP1 - serine carboxypeptidase 1, FHOD3 - formin homology 2 domain containing 3, FGG - fibrinogen gamma chain, VAV3 - vav 3 guanine nucleotide exchange factor, SNX9 - sorting nexin 9, PAX2 - paired box 2, SLC6A4 - solute carrier family 6 (neurotransmitter transporter), member 4, AVIL - advillin, PFN2 - profilin 2, NCK2 - nck adaptor protein 2, PRR16 - proline rich 16, ADRB2 - adrenoceptor beta…
GO:0006586	indolalkylamine metabolic process	0.000665	0.252	7.93	2047	4	258	4	[IDO2 - indoleamine 2,3-dioxygenase 2, ASMT - acetylserotonin o-methyltransferase, AFMID - arylformamidase, HAAO - 3-hydroxyanthranilate 3,4-dioxygenase]
GO:0050870	positive regulation of T cell activation	0.0007	0.255	1.97	2047	25	831	20	[SYK - spleen tyrosine kinase, NFKBID - nuclear factor of kappa light polypeptide gene enhancer in b-cells inhibitor, delta, IGF1 - insulin-like growth factor 1 (somatomedin c), IGFBP2 - insulin-like growth factor binding protein 2, 36kda, EBI3 - epstein-barr virus induced 3, NCK2 - nck adaptor protein 2, CAV1 - caveolin 1, caveolae protein, 22kda, FAM49B - family with sequence similarity 49, mem…
GO:0043542	endothelial cell migration	0.000709	0.249	2.55	2047	14	687	12	[PRSS3 - protease, serine, 3, DPP4 - dipeptidyl-peptidase 4, KDR - kinase insert domain receptor (a type iii receptor tyrosine kinase), GPR124 - g protein-coupled receptor 124, VEGFA - vascular endothelial growth factor a, PLXND1 - plexin d1, CDH13 - cadherin 13, h-cadherin (heart), CLEC14A - c-type lectin domain family 14, member a, CYP1B1 - cytochrome p450, family 1, subfamily b, polypeptide 1,…
GO:0042430	indole-containing compound metabolic process	0.000907	0.307	4.09	2047	6	501	6	[IDO2 - indoleamine 2,3-dioxygenase 2, GRIN2A - glutamate receptor, ionotropic, n-methyl d-aspartate 2a, ASMT - acetylserotonin o-methyltransferase, SLC34A1 - solute carrier family 34 (type ii sodium/phosphate contransporter), member 1, AFMID - arylformamidase, HAAO - 3-hydroxyanthranilate 3,4-dioxygenase]
GO:1903037	regulation of leukocyte cell-cell adhesion	0.000989	0.323	1.74	2047	38	866	28	[SYK - spleen tyrosine kinase, NFKBID - nuclear factor of kappa light polypeptide gene enhancer in b-cells inhibitor, delta, WNK1 - wnk lysine deficient protein kinase 1, NCK2 - nck adaptor protein 2, EBI3 - epstein-barr virus induced 3, CXCL12 - chemokine (c-x-c motif) ligand 12, IL12B - interleukin 12b (natural killer cell stimulatory factor 2, cytotoxic lymphocyte maturation factor 2, p40), HL…
GO:0061004	pattern specification involved in kidney development	0.000996	0.314	12.26	2047	3	167	3	[FOXD1 - forkhead box d1, PAX2 - paired box 2, IRX3 - iroquois homeobox 3]

## Sheet: Female_Process
GO Term	Description	P-value	FDR q-value	Enrichment	N	B	n	b	Genes
GO:0060467	negative regulation of fertilization	9.56e-09	7.56e-05	412	1236	3	3	3	[ZP3 - zona pellucida glycoprotein 3 (sperm receptor), ZP4 - zona pellucida glycoprotein 4, ZP2 - zona pellucida glycoprotein 2 (sperm receptor)]
GO:0007339	binding of sperm to zona pellucida	8.76e-08	0.000347	247.2	1236	5	3	3	[ZP3 - zona pellucida glycoprotein 3 (sperm receptor), ZP4 - zona pellucida glycoprotein 4, ZP2 - zona pellucida glycoprotein 2 (sperm receptor)]
GO:0080154	regulation of fertilization	2.29e-07	0.000603	206	1236	6	3	3	[ZP3 - zona pellucida glycoprotein 3 (sperm receptor), ZP4 - zona pellucida glycoprotein 4, ZP2 - zona pellucida glycoprotein 2 (sperm receptor)]
GO:0035036	sperm-egg recognition	2.29e-07	0.000452	206	1236	6	3	3	[ZP3 - zona pellucida glycoprotein 3 (sperm receptor), ZP4 - zona pellucida glycoprotein 4, ZP2 - zona pellucida glycoprotein 2 (sperm receptor)]
GO:0009988	cell-cell recognition	4.81e-07	0.000761	176.57	1236	7	3	3	[ZP3 - zona pellucida glycoprotein 3 (sperm receptor), ZP4 - zona pellucida glycoprotein 4, ZP2 - zona pellucida glycoprotein 2 (sperm receptor)]
GO:2000242	negative regulation of reproductive process	9.41e-07	0.00124	154.5	1236	8	3	3	[ZP3 - zona pellucida glycoprotein 3 (sperm receptor), ZP4 - zona pellucida glycoprotein 4, ZP2 - zona pellucida glycoprotein 2 (sperm receptor)]
GO:2000360	negative regulation of binding of sperm to zona pellucida	3.93e-06	0.00444	412	1236	2	3	2	[ZP3 - zona pellucida glycoprotein 3 (sperm receptor), ZP4 - zona pellucida glycoprotein 4]
GO:2000359	regulation of binding of sperm to zona pellucida	3.93e-06	0.00389	412	1236	2	3	2	[ZP3 - zona pellucida glycoprotein 3 (sperm receptor), ZP4 - zona pellucida glycoprotein 4]
GO:0019372	lipoxygenase pathway	6.75e-06	0.00594	28.25	1236	5	35	4	[ALOXE3 - arachidonate lipoxygenase 3, ALOX5 - arachidonate 5-lipoxygenase, ALOX12B - arachidonate 12-lipoxygenase, 12r type, ALOX12 - arachidonate 12-lipoxygenase]
GO:0002684	positive regulation of immune system process	1.83e-05	0.0145	7.46	1236	71	21	9	[MUC5B - mucin 5b, oligomeric mucus/gel-forming, DMBT1 - deleted in malignant brain tumors 1, AQP3 - aquaporin 3 (gill blood group), S100A1 - s100 calcium binding protein a1, ZP3 - zona pellucida glycoprotein 3 (sperm receptor), CD19 - cd19 molecule, ZP4 - zona pellucida glycoprotein 4, LGALS3 - lectin, galactoside-binding, soluble, 3, MUC5AC - mucin 5ac, oligomeric mucus/gel-forming]
GO:0042759	long-chain fatty acid biosynthetic process	1.91e-05	0.0137	68.67	1236	6	9	3	[ALOXE3 - arachidonate lipoxygenase 3, ALOX5 - arachidonate 5-lipoxygenase, ALOX12B - arachidonate 12-lipoxygenase, 12r type]
GO:2000344	positive regulation of acrosome reaction	2.32e-05	0.0153	274.67	1236	3	3	2	[ZP3 - zona pellucida glycoprotein 3 (sperm receptor), ZP4 - zona pellucida glycoprotein 4]
GO:0002922	positive regulation of humoral immune response	2.32e-05	0.0141	274.67	1236	3	3	2	[ZP3 - zona pellucida glycoprotein 3 (sperm receptor), ZP4 - zona pellucida glycoprotein 4]
GO:0061436	establishment of skin barrier	2.85e-05	0.0161	23.54	1236	6	35	4	[ALOXE3 - arachidonate lipoxygenase 3, FA2H - fatty acid 2-hydroxylase, ALOX12B - arachidonate 12-lipoxygenase, 12r type, ALOX12 - arachidonate 12-lipoxygenase]
GO:0033561	regulation of water loss via skin	2.85e-05	0.015	23.54	1236	6	35	4	[FA2H - fatty acid 2-hydroxylase, ALOXE3 - arachidonate lipoxygenase 3, ALOX12B - arachidonate 12-lipoxygenase, 12r type, ALOX12 - arachidonate 12-lipoxygenase]
GO:0043901	negative regulation of multi-organism process	2.97e-05	0.0147	68.67	1236	18	3	3	[ZP3 - zona pellucida glycoprotein 3 (sperm receptor), ZP4 - zona pellucida glycoprotein 4, ZP2 - zona pellucida glycoprotein 2 (sperm receptor)]
GO:0008037	cell recognition	2.97e-05	0.0138	68.67	1236	18	3	3	[ZP3 - zona pellucida glycoprotein 3 (sperm receptor), ZP4 - zona pellucida glycoprotein 4, ZP2 - zona pellucida glycoprotein 2 (sperm receptor)]
GO:0043651	linoleic acid metabolic process	3.05e-05	0.0134	35.31	1236	3	35	3	[ALOXE3 - arachidonate lipoxygenase 3, ALOX12B - arachidonate 12-lipoxygenase, 12r type, ALOX12 - arachidonate 12-lipoxygenase]
GO:0051122	hepoxilin biosynthetic process	3.05e-05	0.0127	35.31	1236	3	35	3	[ALOXE3 - arachidonate lipoxygenase 3, ALOX12B - arachidonate 12-lipoxygenase, 12r type, ALOX12 - arachidonate 12-lipoxygenase]
GO:0051121	hepoxilin metabolic process	3.05e-05	0.0121	35.31	1236	3	35	3	[ALOXE3 - arachidonate lipoxygenase 3, ALOX12B - arachidonate 12-lipoxygenase, 12r type, ALOX12 - arachidonate 12-lipoxygenase]
GO:2000241	regulation of reproductive process	4.23e-05	0.0159	61.8	1236	20	3	3	[ZP3 - zona pellucida glycoprotein 3 (sperm receptor), ZP4 - zona pellucida glycoprotein 4, ZP2 - zona pellucida glycoprotein 2 (sperm receptor)]
GO:0042102	positive regulation of T cell proliferation	5.16e-05	0.0186	206	1236	4	3	2	[ZP3 - zona pellucida glycoprotein 3 (sperm receptor), ZP4 - zona pellucida glycoprotein 4]
GO:1905516	positive regulation of fertilization	5.16e-05	0.0178	206	1236	4	3	2	[ZP3 - zona pellucida glycoprotein 3 (sperm receptor), ZP4 - zona pellucida glycoprotein 4]
GO:0060046	regulation of acrosome reaction	5.16e-05	0.017	206	1236	4	3	2	[ZP3 - zona pellucida glycoprotein 3 (sperm receptor), ZP4 - zona pellucida glycoprotein 4]
GO:0050776	regulation of immune response	6.42e-05	0.0203	7.72	1236	61	21	8	[MUC5B - mucin 5b, oligomeric mucus/gel-forming, DMBT1 - deleted in malignant brain tumors 1, S100A1 - s100 calcium binding protein a1, ZP3 - zona pellucida glycoprotein 3 (sperm receptor), CD19 - cd19 molecule, ZP4 - zona pellucida glycoprotein 4, LGALS3 - lectin, galactoside-binding, soluble, 3, MUC5AC - mucin 5ac, oligomeric mucus/gel-forming]
GO:0050778	positive regulation of immune response	7.15e-05	0.0217	9.36	1236	44	21	7	[MUC5B - mucin 5b, oligomeric mucus/gel-forming, DMBT1 - deleted in malignant brain tumors 1, S100A1 - s100 calcium binding protein a1, ZP3 - zona pellucida glycoprotein 3 (sperm receptor), CD19 - cd19 molecule, ZP4 - zona pellucida glycoprotein 4, MUC5AC - mucin 5ac, oligomeric mucus/gel-forming]
GO:0042129	regulation of T cell proliferation	0.000126	0.0371	46.35	1236	10	8	3	[ZP3 - zona pellucida glycoprotein 3 (sperm receptor), ZP4 - zona pellucida glycoprotein 4, LGALS3 - lectin, galactoside-binding, soluble, 3]
GO:0030148	sphingolipid biosynthetic process	0.000222	0.0628	2.24	1236	20	470	17	[ALOXE3 - arachidonate lipoxygenase 3, CERKL - ceramide kinase-like, SGPP2 - sphingosine-1-phosphate phosphatase 2, DEGS2 - delta(4)-desaturase, sphingolipid 2, SPTSSB - serine palmitoyltransferase, small subunit b, ST8SIA6 - st8 alpha-n-acetyl-neuraminide alpha-2,8-sialyltransferase 6, ALOX12B - arachidonate 12-lipoxygenase, 12r type, UGCG - udp-glucose ceramide glucosyltransferase, PRKD1 - prot…
GO:0046467	membrane lipid biosynthetic process	0.000222	0.0607	2.24	1236	20	470	17	[ALOXE3 - arachidonate lipoxygenase 3, CERKL - ceramide kinase-like, SGPP2 - sphingosine-1-phosphate phosphatase 2, DEGS2 - delta(4)-desaturase, sphingolipid 2, SPTSSB - serine palmitoyltransferase, small subunit b, ST8SIA6 - st8 alpha-n-acetyl-neuraminide alpha-2,8-sialyltransferase 6, ALOX12B - arachidonate 12-lipoxygenase, 12r type, UGCG - udp-glucose ceramide glucosyltransferase, PRKD1 - prot…
GO:0002757	immune response-activating signal transduction	0.000228	0.06	13.38	1236	22	21	5	[MUC5B - mucin 5b, oligomeric mucus/gel-forming, DMBT1 - deleted in malignant brain tumors 1, S100A1 - s100 calcium binding protein a1, CD19 - cd19 molecule, MUC5AC - mucin 5ac, oligomeric mucus/gel-forming]
GO:0006636	unsaturated fatty acid biosynthetic process	0.000288	0.0735	37.45	1236	11	9	3	[ALOXE3 - arachidonate lipoxygenase 3, ALOX5 - arachidonate 5-lipoxygenase, ALOX12B - arachidonate 12-lipoxygenase, 12r type]
GO:0002764	immune response-regulating signaling pathway	0.0003	0.0741	12.8	1236	23	21	5	[MUC5B - mucin 5b, oligomeric mucus/gel-forming, DMBT1 - deleted in malignant brain tumors 1, S100A1 - s100 calcium binding protein a1, CD19 - cd19 molecule, MUC5AC - mucin 5ac, oligomeric mucus/gel-forming]
GO:0002920	regulation of humoral immune response	0.00035	0.0838	33.11	1236	8	14	3	[ZP3 - zona pellucida glycoprotein 3 (sperm receptor), CD19 - cd19 molecule, ZP4 - zona pellucida glycoprotein 4]
GO:0032946	positive regulation of mononuclear cell proliferation	0.000419	0.0975	117.71	1236	7	3	2	[ZP3 - zona pellucida glycoprotein 3 (sperm receptor), ZP4 - zona pellucida glycoprotein 4]
GO:0070665	positive regulation of leukocyte proliferation	0.000419	0.0947	117.71	1236	7	3	2	[ZP3 - zona pellucida glycoprotein 3 (sperm receptor), ZP4 - zona pellucida glycoprotein 4]
GO:0050671	positive regulation of lymphocyte proliferation	0.000419	0.092	117.71	1236	7	3	2	[ZP3 - zona pellucida glycoprotein 3 (sperm receptor), ZP4 - zona pellucida glycoprotein 4]
GO:0030104	water homeostasis	0.000435	0.093	36.35	1236	17	6	3	[AQP3 - aquaporin 3 (gill blood group), ALOXE3 - arachidonate lipoxygenase 3, ALOX12B - arachidonate 12-lipoxygenase, 12r type]
GO:0050891	multicellular organismal water homeostasis	0.000435	0.0905	36.35	1236	17	6	3	[AQP3 - aquaporin 3 (gill blood group), ALOXE3 - arachidonate lipoxygenase 3, ALOX12B - arachidonate 12-lipoxygenase, 12r type]
GO:0043900	regulation of multi-organism process	0.000435	0.0882	33.41	1236	37	3	3	[ZP3 - zona pellucida glycoprotein 3 (sperm receptor), ZP4 - zona pellucida glycoprotein 4, ZP2 - zona pellucida glycoprotein 2 (sperm receptor)]
GO:0002253	activation of immune response	0.000477	0.0943	11.77	1236	25	21	5	[MUC5B - mucin 5b, oligomeric mucus/gel-forming, DMBT1 - deleted in malignant brain tumors 1, S100A1 - s100 calcium binding protein a1, CD19 - cd19 molecule, MUC5AC - mucin 5ac, oligomeric mucus/gel-forming]
GO:0002682	regulation of immune system process	0.000494	0.0953	5.04	1236	105	21	9	[MUC5B - mucin 5b, oligomeric mucus/gel-forming, DMBT1 - deleted in malignant brain tumors 1, AQP3 - aquaporin 3 (gill blood group), S100A1 - s100 calcium binding protein a1, CD19 - cd19 molecule, ZP3 - zona pellucida glycoprotein 3 (sperm receptor), ZP4 - zona pellucida glycoprotein 4, LGALS3 - lectin, galactoside-binding, soluble, 3, MUC5AC - mucin 5ac, oligomeric mucus/gel-forming]
GO:0032944	regulation of mononuclear cell proliferation	0.000516	0.0972	33.11	1236	14	8	3	[ZP3 - zona pellucida glycoprotein 3 (sperm receptor), ZP4 - zona pellucida glycoprotein 4, LGALS3 - lectin, galactoside-binding, soluble, 3]
GO:0070663	regulation of leukocyte proliferation	0.000516	0.0949	33.11	1236	14	8	3	[ZP3 - zona pellucida glycoprotein 3 (sperm receptor), ZP4 - zona pellucida glycoprotein 4, LGALS3 - lectin, galactoside-binding, soluble, 3]
GO:0050670	regulation of lymphocyte proliferation	0.000516	0.0927	33.11	1236	14	8	3	[ZP3 - zona pellucida glycoprotein 3 (sperm receptor), ZP4 - zona pellucida glycoprotein 4, LGALS3 - lectin, galactoside-binding, soluble, 3]
GO:0001676	long-chain fatty acid metabolic process	0.000594	0.105	31.69	1236	13	9	3	[ALOXE3 - arachidonate lipoxygenase 3, ALOX5 - arachidonate 5-lipoxygenase, ALOX12B - arachidonate 12-lipoxygenase, 12r type]
GO:0016064	immunoglobulin mediated immune response	0.000635	0.109	58.86	1236	3	14	2	[ZP3 - zona pellucida glycoprotein 3 (sperm receptor), CD19 - cd19 molecule]
GO:0019724	B cell mediated immunity	0.000635	0.107	58.86	1236	3	14	2	[CD19 - cd19 molecule, ZP3 - zona pellucida glycoprotein 3 (sperm receptor)]
GO:0002758	innate immune response-activating signal transduction	0.000648	0.107	15.7	1236	15	21	4	[MUC5B - mucin 5b, oligomeric mucus/gel-forming, DMBT1 - deleted in malignant brain tumors 1, S100A1 - s100 calcium binding protein a1, MUC5AC - mucin 5ac, oligomeric mucus/gel-forming]
GO:0006690	icosanoid metabolic process	0.000786	0.127	29.43	1236	14	9	3	[ALOXE3 - arachidonate lipoxygenase 3, ALOX5 - arachidonate 5-lipoxygenase, ALOX12B - arachidonate 12-lipoxygenase, 12r type]
GO:0010513	positive regulation of phosphatidylinositol biosynthetic process	0.000809	0.128	1236	1236	1	1	1	[ZP3 - zona pellucida glycoprotein 3 (sperm receptor)]
GO:0010511	regulation of phosphatidylinositol biosynthetic process	0.000809	0.126	1236	1236	1	1	1	[ZP3 - zona pellucida glycoprotein 3 (sperm receptor)]
GO:0002455	humoral immune response mediated by circulating immunoglobulin	0.000809	0.123	1236	1236	1	1	1	[ZP3 - zona pellucida glycoprotein 3 (sperm receptor)]
GO:0001807	regulation of type IV hypersensitivity	0.000809	0.121	1236	1236	1	1	1	[ZP3 - zona pellucida glycoprotein 3 (sperm receptor)]
GO:0001809	positive regulation of type IV hypersensitivity	0.000809	0.119	1236	1236	1	1	1	[ZP3 - zona pellucida glycoprotein 3 (sperm receptor)]
GO:2000387	regulation of antral ovarian follicle growth	0.000809	0.116	1236	1236	1	1	1	[ZP3 - zona pellucida glycoprotein 3 (sperm receptor)]
GO:2000388	positive regulation of antral ovarian follicle growth	0.000809	0.114	1236	1236	1	1	1	[ZP3 - zona pellucida glycoprotein 3 (sperm receptor)]
GO:2000386	positive regulation of ovarian follicle development	0.000809	0.112	1236	1236	1	1	1	[ZP3 - zona pellucida glycoprotein 3 (sperm receptor)]
GO:2000368	positive regulation of acrosomal vesicle exocytosis	0.000809	0.11	1236	1236	1	1	1	[ZP3 - zona pellucida glycoprotein 3 (sperm receptor)]
GO:0002885	positive regulation of hypersensitivity	0.000809	0.109	1236	1236	1	1	1	[ZP3 - zona pellucida glycoprotein 3 (sperm receptor)]
GO:0002883	regulation of hypersensitivity	0.000809	0.107	1236	1236	1	1	1	[ZP3 - zona pellucida glycoprotein 3 (sperm receptor)]
GO:0002866	positive regulation of acute inflammatory response to antigenic stimulus	0.000809	0.105	1236	1236	1	1	1	[ZP3 - zona pellucida glycoprotein 3 (sperm receptor)]
GO:0002218	activation of innate immune response	0.000927	0.118	14.71	1236	16	21	4	[MUC5B - mucin 5b, oligomeric mucus/gel-forming, DMBT1 - deleted in malignant brain tumors 1, S100A1 - s100 calcium binding protein a1, MUC5AC - mucin 5ac, oligomeric mucus/gel-forming]
GO:1990266	neutrophil migration	0.000949	0.119	48.47	1236	3	17	2	[UMOD - uromodulin, LGALS3 - lectin, galactoside-binding, soluble, 3]
GO:0033559	unsaturated fatty acid metabolic process	0.000994	0.123	27.47	1236	15	9	3	[ALOXE3 - arachidonate lipoxygenase 3, ALOX5 - arachidonate 5-lipoxygenase, ALOX12B - arachidonate 12-lipoxygenase, 12r type]
